# Supplementary material for: Influence of a strict glucose protocol on serum potassium and glucose concentrations and their association with mortality in intensive care patients
Source: Springer Nature journal article supplement (doi:10.1186/s13054-015-0959-9), 2015-06-22

Additional file 1: details of the Tight Glucose Protocol

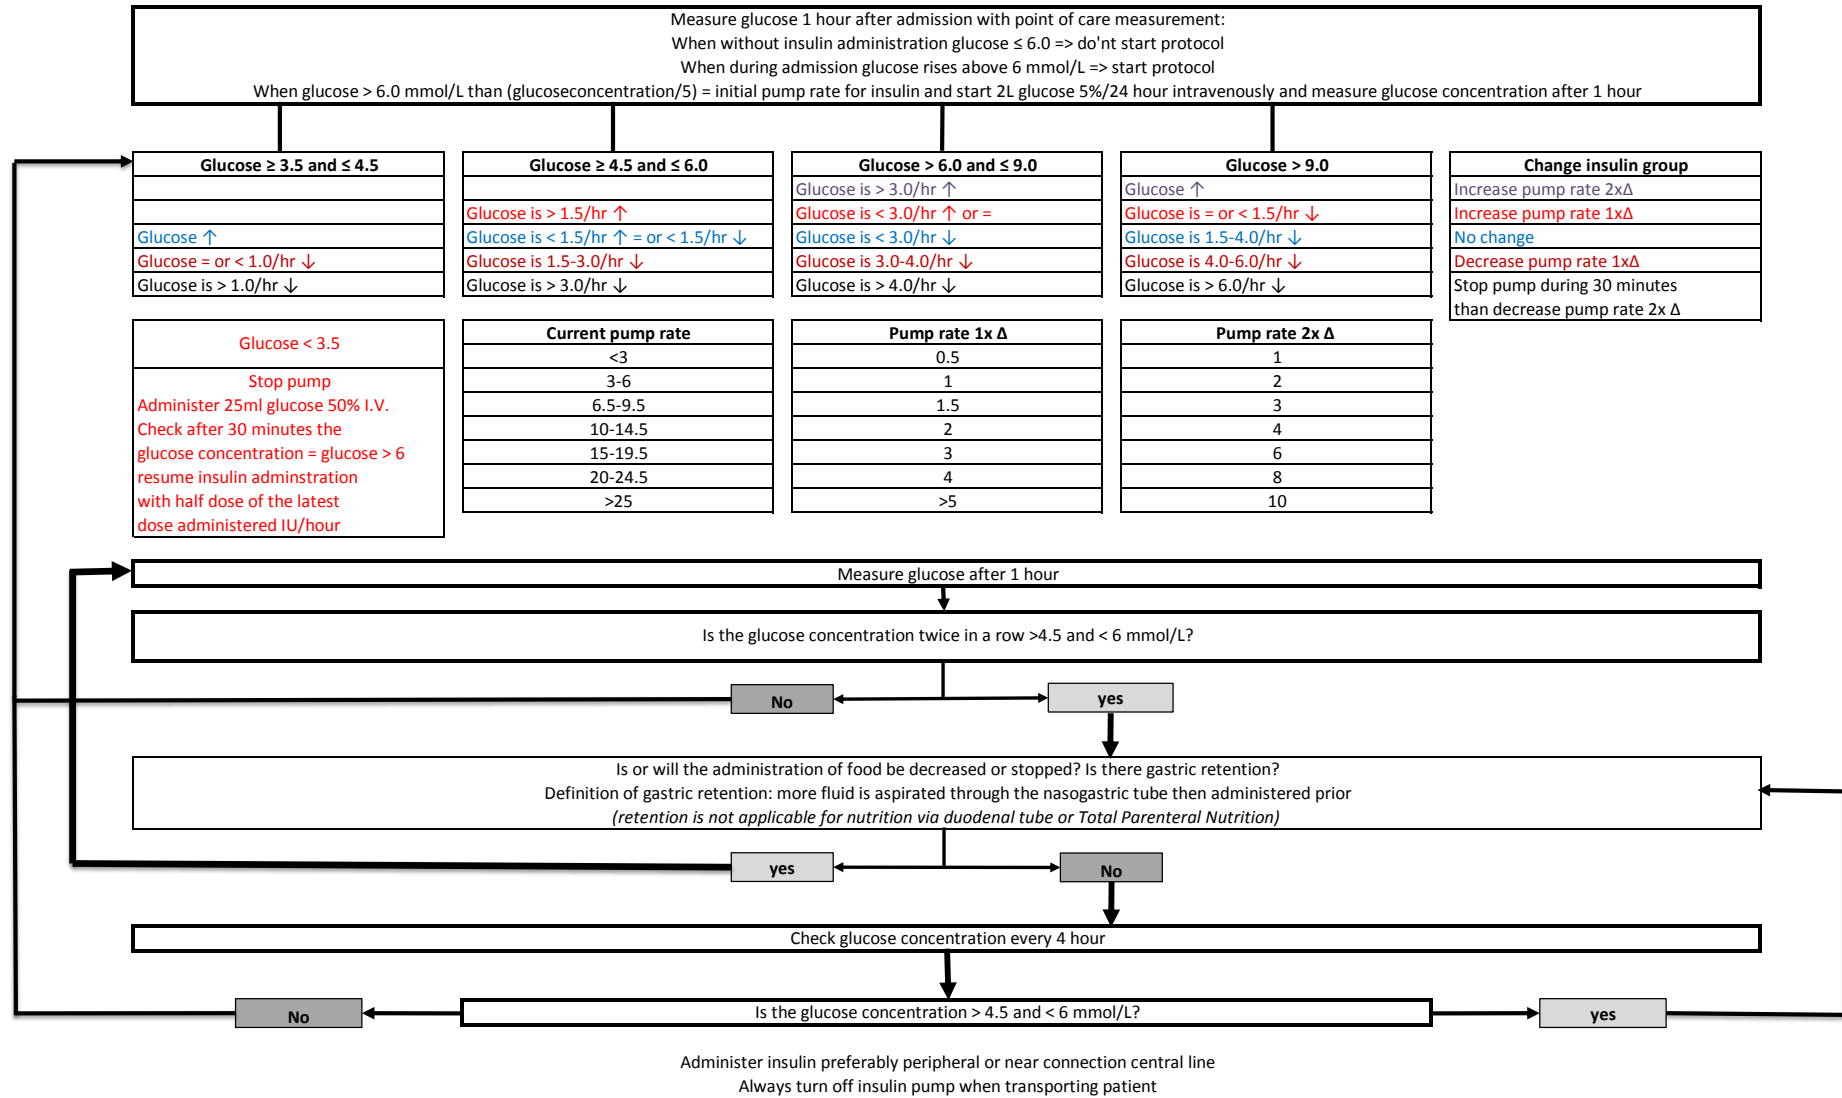

Supplement: MOESM1 [file 9780528]
